# Supplementary material for: Biotransformative removal of cationic Red X-GRL by anaerobic activated sludge
Source: Royal Society of Chemistry journal article supplement (doi:10.1039/c5ra01331c), 2015-01-01
Supplement: c5ra01331c1.pdf [file c5ra01331c1.pdf]

# Supporting materials for

## Biotransformative Removal of Cationic Red X-GRL by Anaerobic Activated Sludge

Bin Qiu,<sup>1,2</sup> Xinzhu Xu,<sup>1</sup> Yan Dang,<sup>1</sup> Qiang Wang,<sup>1</sup> Dezhi Sun,<sup>1\*</sup> Suying Wei,<sup>3</sup> and Zhanhu

Guo<sup>2\*</sup>

<sup>1</sup>Beijing Key Lab for Source Control Technology of Water Pollution  
Beijing Forestry University, Beijing 100083 China

<sup>2</sup>Integrated Composites Laboratory (ICL),  
Department of Chemical and Biomolecular Engineering  
University of Tennessee, Knoxville, TN 37996 USA

<sup>3</sup>Department of Chemistry and Biochemistry  
Lamar University, Beaumont, TX 77710 USA

\*: to whom the correspondence should be addressed

[sundezhi@bjfu.edu.cn](mailto:sundezhi@bjfu.edu.cn) (D. S.)

[zguo10@utk.edu](mailto:zguo10@utk.edu) (Z. G.)

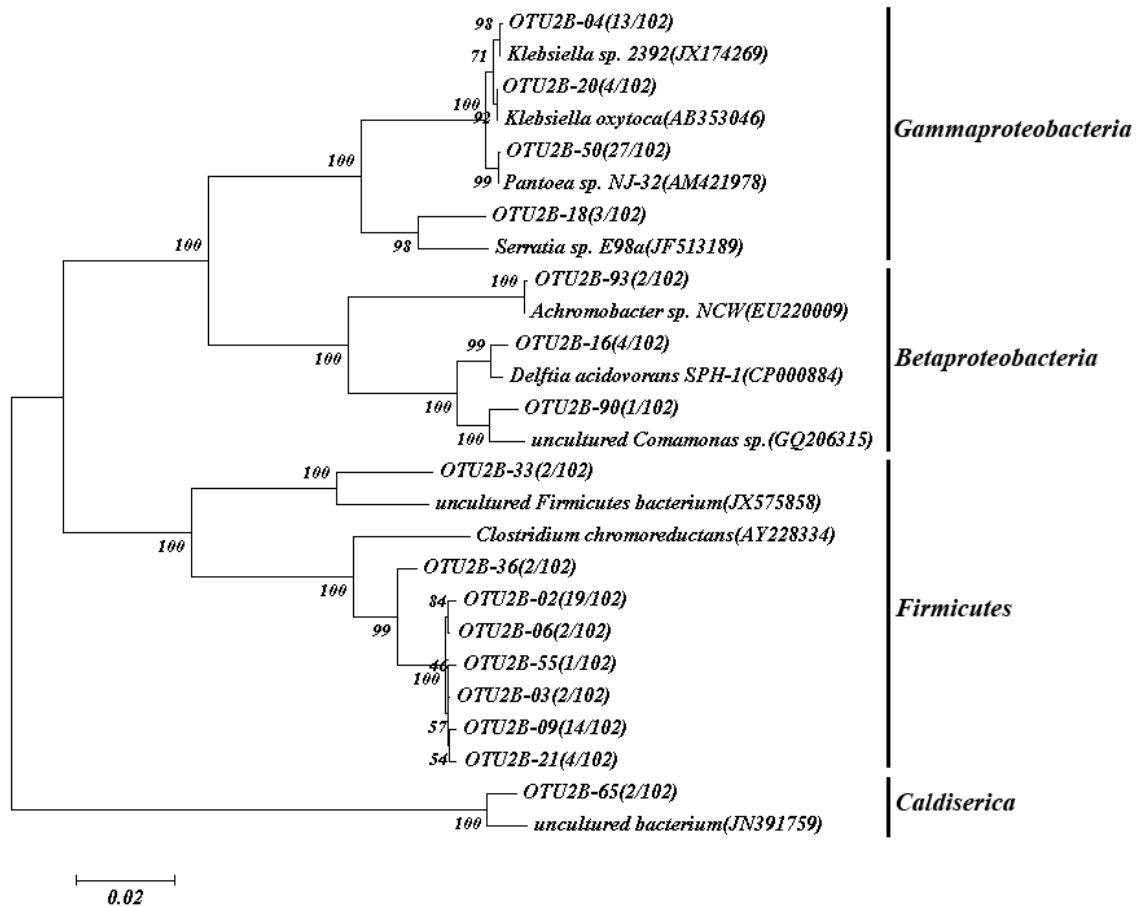

**Fig. S1** Phylogenetic trees for the bacteria detected in the activated sludge fed with 200 mg/L X-GRL.

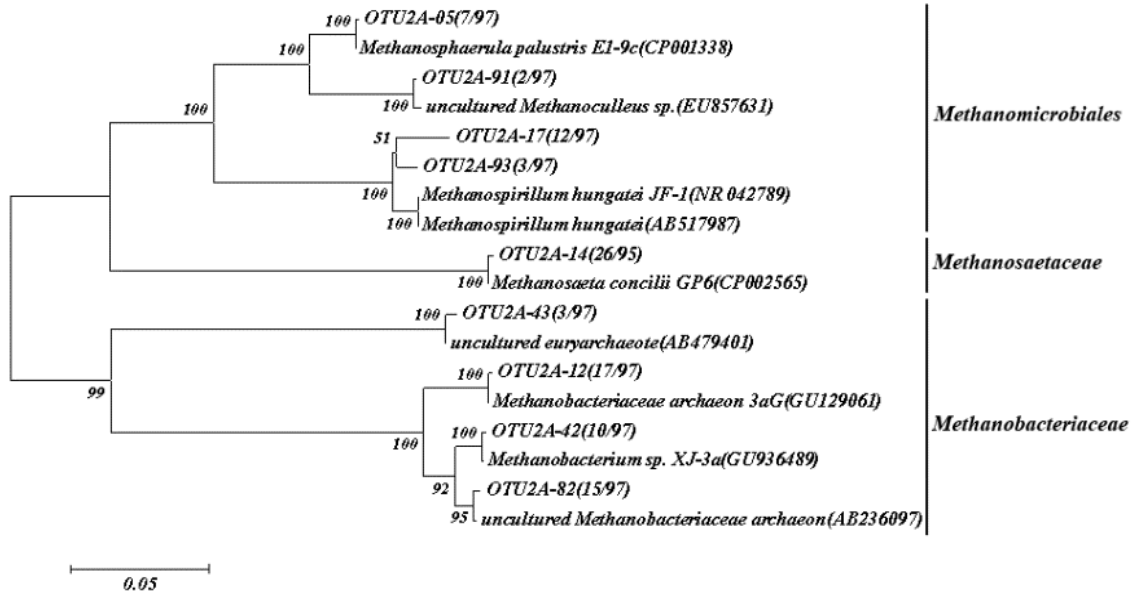

**Fig. S2** Phylogenetic trees for the archaea detected in the activated sludge fed with 200 mg/L X-GRL.
